# Supplementary material for: Prediction of corrosion failure probability of buried oil and gas pipeline based on an RBF neural network
Source: Frontiers journal article supplement (doi:10.3389/feart.2023.1148407), 2023-03-30
Supplement: Data_Sheet_1.docx [file Data_Sheet_1.docx]

# Supplementary Material

Training error curve Matlab code:

clc;clear all;close all

rng(0)

xlsfile='8.xlsx';

[data1,~]=xlsread(xlsfile,1,'d4:e33');

P_train=data1((1:25),1)';

P_test=data1((26:30),1)';

T_train=data1((1:25),2)';

T_test=data1((26:30),2)';

[p_train,ps_input]=mapminmax(P_train,0,1);

p_test=mapminmax('apply',P_test,ps_input);

[t_train,ps_output]=mapminmax(T_train,0,1);

i=1;

% for rbf_spread=0.1:0.1:1

% net=newrb(p_train,t_train,0.04,rbf_spread);

% net=newrbe(p_train,t_train,rbf_spread);

% t_sim1=sim(net,p_test);

% T_sim1=mapminmax('reverse',t_sim1,ps_output);

% error2(i,:)=(T_sim1-T_test);

% R=corrcoef(T_sim1,T_test);

% corr(i)=R(2)*R(2)

% i=(i+1);

% end

net=newrb(p_train,t_train,0.04,0.2);

% net=newrbe(p_train,t_train,rbf_spread);

t_sim1=sim(net,p_test);

T_sim1=mapminmax('reverse',t_sim1,ps_output);

R=corrcoef(T_sim1,T_test);

corr=R(2)*R(2)

newrb radial basis function matlab code:

clc;clear all;close all

rng(0)

xlsfile='8.xlsx';

[data1,~]=xlsread(xlsfile,1,'d4:e33');

P_train=data1((1:25),1)';

P_test=data1((26:30),1)';

T_train=data1((1:25),2)';

T_test=data1((26:30),2)';

[p_train,ps_input]=mapminmax(P_train,0,1);

p_test=mapminmax('apply',P_test,ps_input);

[t_train,ps_output]=mapminmax(T_train,0,1);

i=1;

for rbf_spread=0.1:0.1:1

net=newrb(p_train,t_train,0.04,rbf_spread);

t_sim1=sim(net,p_test);

T_sim1=mapminmax('reverse',t_sim1,ps_output);

error2(i,:)=(T_sim1-T_test);

R=corrcoef(T_sim1,T_test);

corr(i)=R(2)*R(2)

i=(i+1);

end

figure(1)

plot(0.1:0.1:1,corr,'r-o')

xlabel('Spread')

ylabel('R2')

ylim([0,1])

newrbe radial basis function matlab code:

clc;clear all;close all

rng(0)

xlsfile='8.xlsx';

[data1,~]=xlsread(xlsfile,1,'d4:e33');

P_train=data1((1:25),1)';

P_test=data1((26:30),1)';

T_train=data1((1:25),2)';

T_test=data1((26:30),2)';

[p_train,ps_input]=mapminmax(P_train,0,1);

p_test=mapminmax('apply',P_test,ps_input);

[t_train,ps_output]=mapminmax(T_train,0,1);

i=1;

for rbf_spread=0.1:0.1:1

% net=newrb(p_train,t_train,0.04,rbf_spread);

net=newrbe(p_train,t_train,rbf_spread);

t_sim1=sim(net,p_test);

T_sim1=mapminmax('reverse',t_sim1,ps_output);

error2(i,:)=(T_sim1-T_test);

R=corrcoef(T_sim1,T_test);

corr(i)=R(2)*R(2)

i=(i+1);

end

figure(1)

plot(0.1:0.1:1,corr,'r-o')

xlabel('Spread')

ylabel('R2')

ylim([0,1])

[a,xiaobiao]=max(corr);

figure(2)

plot(1:5,error2(xiaobiao,:),'b-o')

xlabel('item')

ylabel('value')

ylim([0,0.01])
